# Supplementary material for: Solvent effects on structure, photoresponse and speed of gelation of a dicholesterol-linked azobenzene organogel
Source: Royal Society of Chemistry journal article supplement (doi:10.1039/c1sm06240a), 2011-01-01
Supplement: c1sm06240a.pdf [file c1sm06240a.pdf]

**Electronic Supplementary Information (ESI) for**

**Solvent Effects on Structure, Photoresponse and Speed of  
Gelation of a Dicholesterol-linked Azobenzene Organogel**

**Yeping Wu,<sup>a</sup> Si Wu,<sup>b</sup> Gang Zou<sup>a</sup> and Qijin Zhang<sup>\*a</sup>**

<sup>a</sup> CAS Key Laboratory of Soft Matter Chemistry, Department of Polymer Science and Engineering, Anhui Key Laboratory of Optoelectronic Science and Technology, University of Science and Technology of China, Hefei, Anhui, 230026 P.R. China. Fax: +86 551 3601704; E-mail: zqjm@ustc.edu.cn

<sup>b</sup> Max Planck Institute for Polymer Research, Ackermannweg 10, 55128 Mainz, Germany

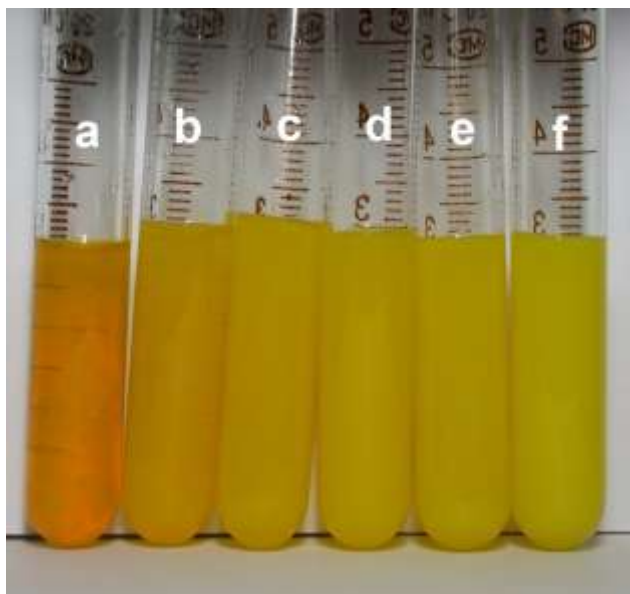

**Fig. S1** Pictures of gels (1% w/v) at different methanol content: (a) 0%; (b) 5%; (c) 10%; (d) 15%; (e) 20%; (f) 30%.

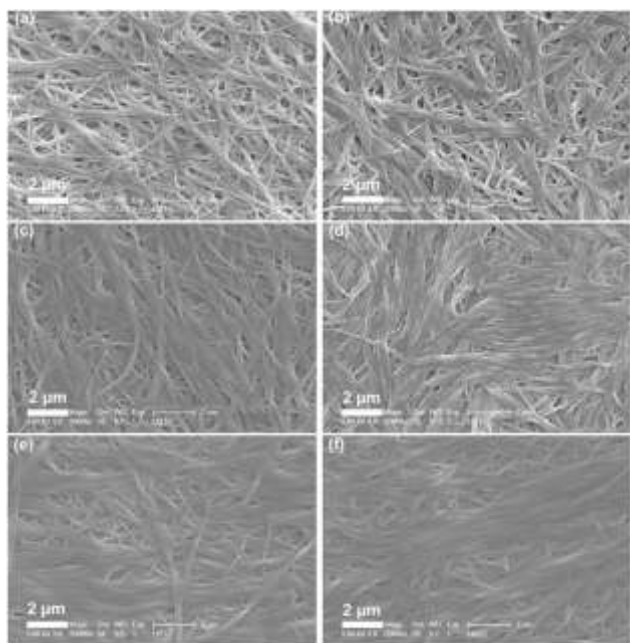

**Fig. S2** SEM images of xerogels (1% w/v) prepared at different methanol content: (a) 0%; (b) 5%; (c) 10%; (d) 15%; (e) 20%; (f) 30%.

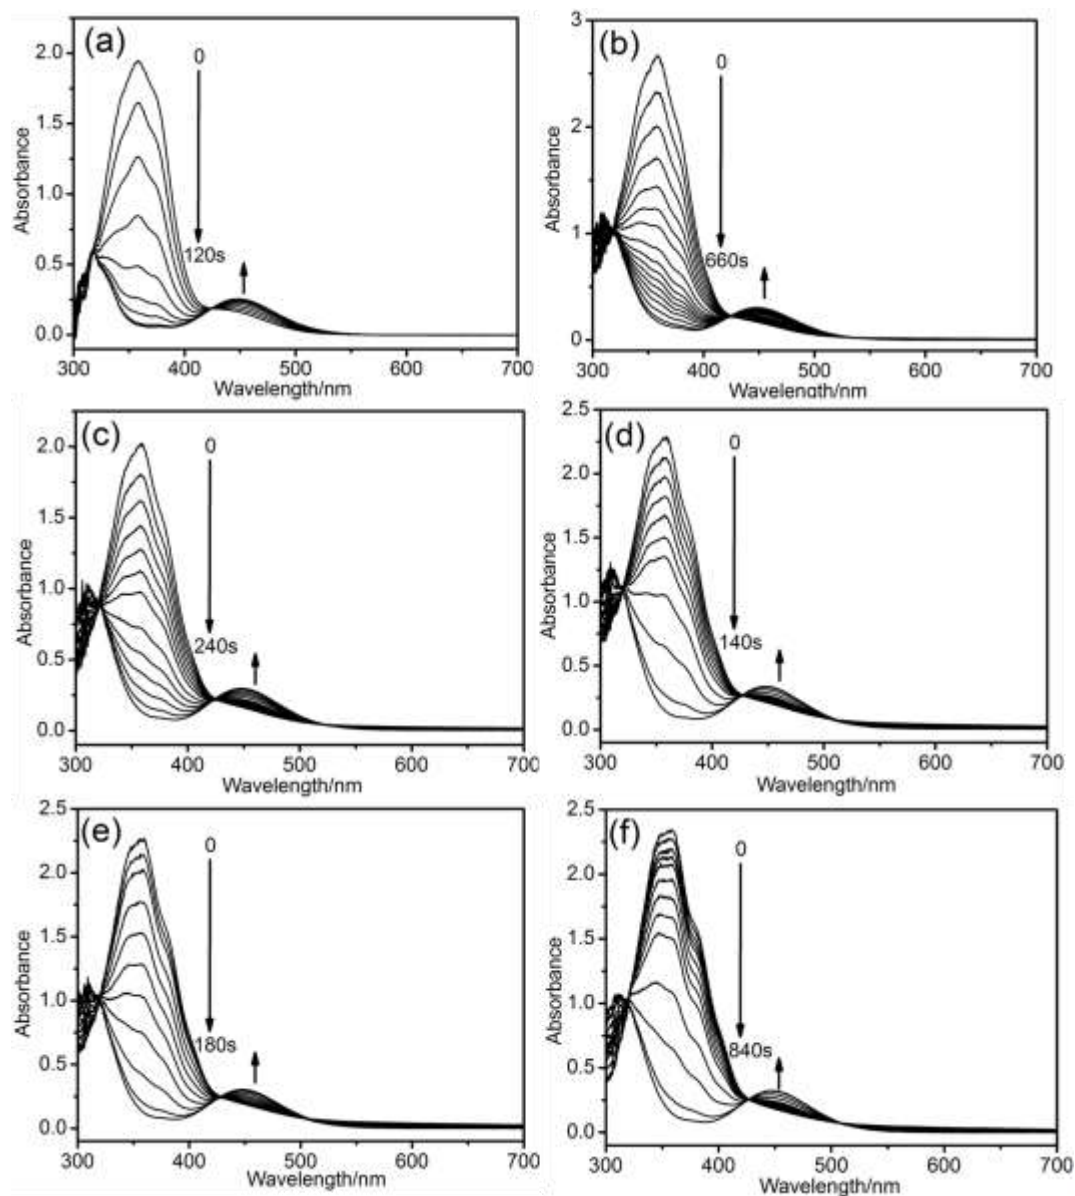

**Fig. S3** UV-vis spectral changes of the gels (1% w/v, 0.13 mm path length) irradiated with 365 nm light at different methanol content: (a) 0%; (b) 5%; (c) 10%; (d) 15%; (e) 20%; (f) 30%.

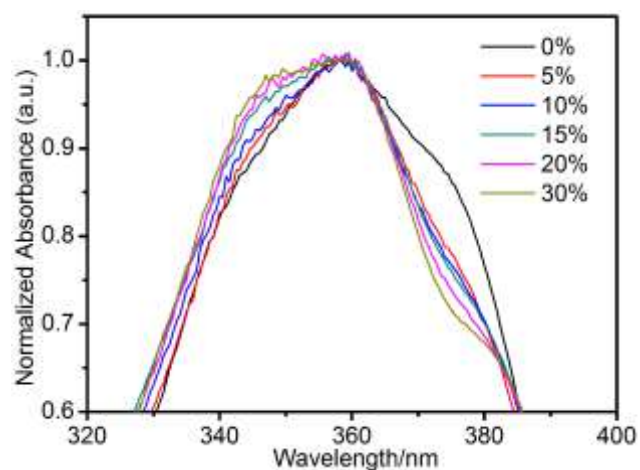

**Fig. S4** Normalized UV-vis spectra of the gels (1% w/v, 0.13 mm path length) at different methanol content.

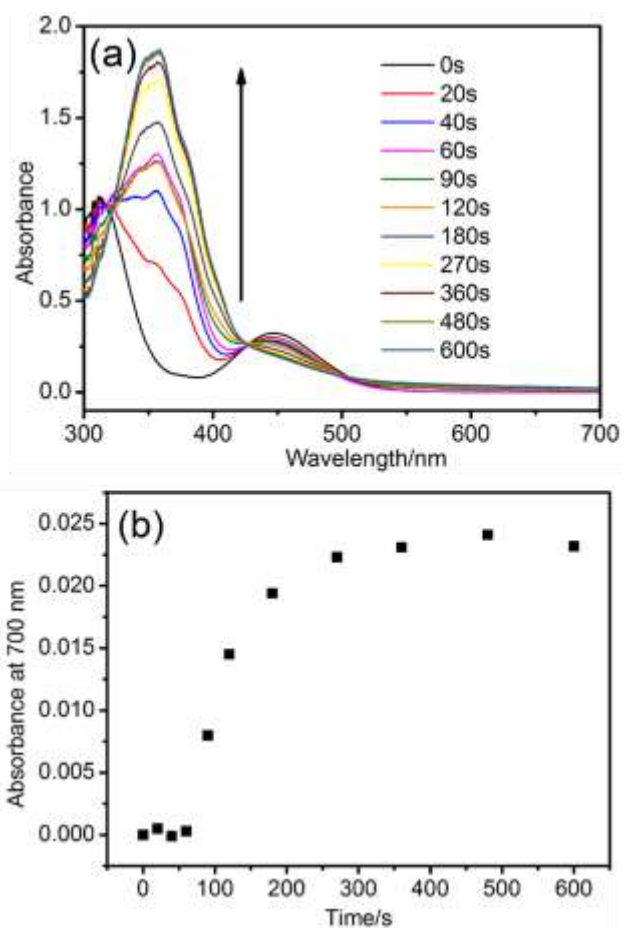

**Fig. S5** (a) UV-vis spectral changes of the gel with 30% methanol (1% w/v, 0.13 mm path length) irradiated with 435 nm light after irradiation with 365 nm light for 840 s. (b) Intensities of UV-vis absorbance at 700 nm as a function of time during the visible light (435 nm) irradiation of the gel with 30% methanol (1% w/v, 0.13 mm path length).

As shown in Fig. S5a, compared to the spectrum of irradiated for 60 s, a shoulder

peak shown at the left part of the  $\pi$ - $\pi^*$  absorption band of the spectrum for 90 s, and this shoulder peak became obvious afterwards. For Fig. S5b, absorbance at 700 nm is ascribed to scattering caused by the fiber network of the gel, which became obvious gradually since irradiated for 90 s. These results both indicate that the gel began to reform when the sol was irradiated with visible light for 90 s (before the entire *cis-trans* isomerization (visible light irradiation) was accomplished, corresponding to the “0 min” in Table 2).

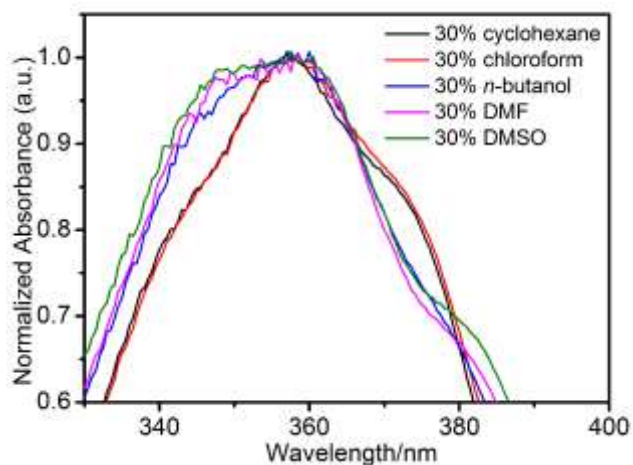

**Fig. S6** Normalized UV-vis spectra of the solutions ((a) 30% cyclohexane and (b) 30% chloroform) and the gels ((c) 30% *n*-butanol, (d) 30% DMF and (e) 30% DMSO). The concentration of DCAZO2 is 1% w/v in all the samples.

## Calculations of the solubility parameters of the solvents

Table S1. Hansen parameters of cyclopentanone, methanol, cyclohexane, *n*-butanol, chloroform, DMF and DMSO

| Solvent           | $\delta_d/\text{MPa}^{1/2}$ | $\delta_p/\text{MPa}^{1/2}$ | $\delta_h/\text{MPa}^{1/2}$ |
|-------------------|-----------------------------|-----------------------------|-----------------------------|
| cyclopentanone    | 17.9                        | 11.9                        | 5.2                         |
| methanol          | 15.1                        | 12.3                        | 22.3                        |
| cyclohexane       | 16.8                        | 0.0                         | 0.2                         |
| <i>n</i> -butanol | 16.0                        | 5.7                         | 15.8                        |
| chloroform        | 17.8                        | 3.1                         | 5.7                         |
| DMF               | 17.4                        | 13.7                        | 11.3                        |
| DMSO              | 18.4                        | 16.4                        | 10.2                        |

These data are taken from C. M. Hansen, *Hansen solubility parameters: a user's handbook*, CRC Press, Boca Raton, 2007.

Table S2. The Hansen parameters of the mixed solvents calculated according to  $\delta_{\text{average}}$

$$= \sum \phi_i \delta_i \text{ (Equ. 68 of } \textit{Chemical Reviews}, 1975, 75, 731-753.)$$

| Mixed solvents        | $\delta_d/\text{MPa}^{1/2}$ | $\delta_p/\text{MPa}^{1/2}$ | $\delta_h/\text{MPa}^{1/2}$ |
|-----------------------|-----------------------------|-----------------------------|-----------------------------|
| 0% methanol           | 17.9                        | 11.9                        | 5.2                         |
| 5% methanol           | 17.8                        | 11.9                        | 6.1                         |
| 10% methanol          | 17.6                        | 11.9                        | 6.9                         |
| 15% methanol          | 17.5                        | 12.0                        | 7.8                         |
| 20% methanol          | 17.3                        | 12.0                        | 8.6                         |
| 30% methanol          | 17.1                        | 12.0                        | 10.3                        |
| 30% cyclohexane       | 17.6                        | 8.3                         | 3.7                         |
| 30% <i>n</i> -butanol | 17.3                        | 10.0                        | 8.4                         |
| 30% chloroform        | 17.9                        | 9.3                         | 5.4                         |
| 30% DMF               | 17.8                        | 12.4                        | 7.0                         |
| 30% DMSO              | 18.1                        | 13.3                        | 6.7                         |
| 50% methanol          | 16.5                        | 12.1                        | 13.8                        |

Table S3. The Teas parameters of the solvents

| Mixed solvents | $f_d$ | $f_p$ | $f_h$ |
|----------------|-------|-------|-------|
| 0% methanol    | 0.511 | 0.340 | 0.149 |
| 5% methanol    | 0.497 | 0.332 | 0.170 |
| 10% methanol   | 0.484 | 0.327 | 0.190 |
| 15% methanol   | 0.469 | 0.322 | 0.209 |
| 20% methanol   | 0.456 | 0.317 | 0.227 |
| 30% methanol   | 0.434 | 0.305 | 0.261 |
| methanol       | 0.304 | 0.247 | 0.449 |

|                       |       |       |       |
|-----------------------|-------|-------|-------|
| 30% cyclohexane       | 0.595 | 0.280 | 0.125 |
| 30% <i>n</i> -butanol | 0.485 | 0.280 | 0.235 |
| 30% chloroform        | 0.549 | 0.285 | 0.166 |
| 30% DMF               | 0.478 | 0.333 | 0.188 |
| 30% DMSO              | 0.475 | 0.349 | 0.176 |
| 50% methanol          | 0.389 | 0.285 | 0.326 |

These parameters are calculated according to the following equations.

$$f_d = \delta_d / (\delta_d + \delta_p + \delta_h)$$

$$f_p = \delta_p / (\delta_d + \delta_p + \delta_h)$$

$$f_h = \delta_h / (\delta_d + \delta_p + \delta_h)$$

## Calculations of the solubility parameters of the gelator DCAZO2

The Hansen parameters of **DCAZO2** are calculated according to a group-contribution method reported in “Int. J. Thermophys. 2008, 29, 568–585”.

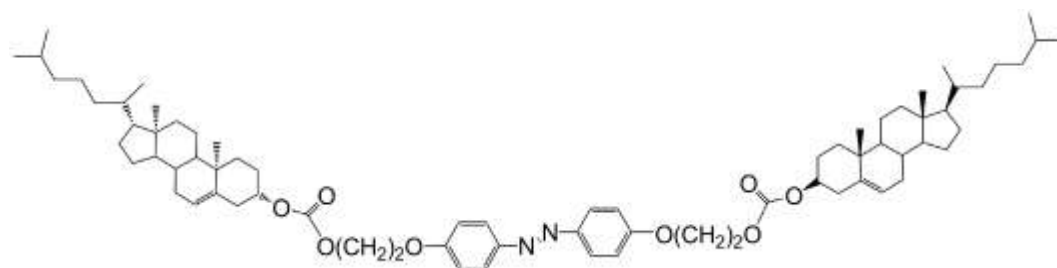

**Fig. S8** Molecular structure of **DCAZO2**.

Table S4. First-order group approximation for the prediction of the dispersion partial solubility parameter,  $\delta_d$ , the polar partial solubility parameter,  $\delta_p$ , and the hydrogen bonding partial solubility parameter,  $\delta_h$ , for the repeat unit of **DCAZO2**

| First order group  | Occurrences, $N_i$ | Contributions, $C_i (\delta_d)$ | $N_i C_i (\delta_d)$ | Contributions, $C_i (\delta_p)$ | $N_i C_i (\delta_p)$ | Contributions, $C_i (\delta_h)$ | $N_i C_i (\delta_h)$ |
|--------------------|--------------------|---------------------------------|----------------------|---------------------------------|----------------------|---------------------------------|----------------------|
| N(except as above) | 2                  | 1.5438                          | 3.0876               | 2.5780                          | 5.1560               | ***                             | ***                  |
| AC                 | 4                  | 0.8446                          | 3.3784               | 0.6187                          | 2.4748               | -0.17405                        | -0.6962              |
| ACH                | 8                  | 0.1105                          | 0.884                | -0.5303                         | -4.2424              | 0.13532                         | 1.08256              |
| CH <sub>2</sub> O  | 4                  | 0.0310                          | 0.124                | 0.8826                          | 3.5304               | ***                             | ***                  |
| COO                | 2                  | 0.2039                          | 0.4078               | 3.4637                          | 6.9274               | 0.37204                         | 0.74408              |
| -CH=C<             | 2                  | 0.5372                          | 1.0744               | -0.9024                         | -1.8048              | -0.03066                        | -0.06132             |
| -CH<               | 14                 | 0.6450                          | 9.03                 | 0.6491                          | 9.0874               | 0.1386                          | 1.9404               |
| >C<                | 4                  | 1.2686                          | 5.0744               | 2.0838                          | 8.3352               | ***                             | ***                  |

|                                   |    |         |         |         |         |          |         |
|-----------------------------------|----|---------|---------|---------|---------|----------|---------|
| -CH <sub>2</sub> -                | 22 | -0.0269 | -0.5918 | -0.3045 | -6.699  | -0.11610 | -2.5542 |
| -CH <sub>3</sub>                  | 10 | -0.9714 | -9.714  | -1.6448 | -16.448 | 0.29901  | 2.9901  |
| Constant,<br>C                    |    |         | 17.3231 |         | 7.3548  |          | 1.3720  |
| ΣN <sub>i</sub> C <sub>i</sub> +C |    |         | 30.0779 |         | 13.6718 |          | 4.81742 |

Table S5. Second-order group approximation for the prediction of the dispersion partial solubility parameter,  $\delta_d$ , the polar partial solubility parameter,  $\delta_p$ , and the hydrogen bonding partial solubility parameter,  $\delta_h$ , for the repeat unit of **DCAZO2**

| Second order group                   | Occurrences, M <sub>j</sub> | Contributions, D <sub>j</sub> (δ <sub>d</sub> ) | M <sub>j</sub> D <sub>j</sub> (δ <sub>d</sub> ) | Contributions, D <sub>j</sub> (δ <sub>p</sub> ) | M <sub>j</sub> D <sub>j</sub> (δ <sub>p</sub> ) | Contributions, D <sub>j</sub> (δ <sub>h</sub> ) | M <sub>j</sub> D <sub>j</sub> (δ <sub>h</sub> ) |
|--------------------------------------|-----------------------------|-------------------------------------------------|-------------------------------------------------|-------------------------------------------------|-------------------------------------------------|-------------------------------------------------|-------------------------------------------------|
| (CH <sub>3</sub> ) <sub>2</sub> -CH- | 2                           | 0.0460                                          | 0.092                                           | 0.0019                                          | 0.0038                                          | 10 <sup>-8</sup>                                | 2*10 <sup>-8</sup>                              |
| AC-O-C                               | 2                           | 0.2568                                          | 0.5136                                          | 0.8153                                          | 1.6306                                          | ***                                             | ***                                             |
| String in cyclic                     | 2                           | -0.1945                                         | -0.389                                          | ***                                             | ***                                             | -0.280859                                       | -0.561718                                       |
| ΣM <sub>j</sub> D <sub>j</sub>       |                             |                                                 | 0.2166                                          |                                                 | 1.6344                                          |                                                 | -0.561718                                       |

$$\delta_d = 30.0779 + 0.2166 = 30.2945$$

$$\delta_p = 13.6718 + 1.6344 = 15.3062$$

$$\delta_h = 4.81742 - 0.561718 = 4.255702$$

The Teas parameter of **DCAZO2** can be calculated as follows:

$$f_d = \delta_d / (\delta_d + \delta_p + \delta_h) = 30.2945 / 49.856402 = 0.608$$

$$f_p = \delta_p / (\delta_d + \delta_p + \delta_h) = 15.3062 / 49.856402 = 0.307$$

$$f_h = \delta_h / (\delta_d + \delta_p + \delta_h) = 4.255702 / 49.856402 = 0.085$$
